# Supplementary material for: Different Quality Classes of Decomposing Plant Residues Influence Dissolved Organic Matter Stoichiometry Which Results in Different Soil Microbial Processing
Source: MDPI journal article supplement (doi:10.3390/soilsystems8010028), 2024-02-28
Supplement: s1 [file s1]

# Different Quality Classes of Decomposing Plant Residues Influence Dissolved Organic Matter Stoichiometry Which Results in Different Soil Microbial Processing

Ratanaporn Poosathit <sup>1,2</sup>, Benjapon Kunlanit <sup>2,3</sup>, Frank Rasche <sup>4,†</sup> and Patma Vityakon <sup>1,2,\*</sup>

<sup>1</sup> Department of Soil Science and Environment, Faculty of Agriculture, Khon Kaen University, Khon Kaen 40002, Thailand; ratanaporn.p@kkumail.com

<sup>2</sup> Soil Organic Matter Management Research Group, Khon Kaen University, Khon Kaen 40002, Thailand; benjapon.k@msu.ac.th

<sup>3</sup> Department of Agricultural Technology, Faculty of Technology, Mahasarakham University, Maha Sarakham 44150, Thailand

<sup>4</sup> Institute of Agricultural Sciences in the Tropics (Hans-Ruthenberg-Institute), University of Hohenheim, 70593 Stuttgart, Germany; f.rasche@cgiar.org

\* Correspondence: patma@kku.ac.th; Tel.: +66-87-643-2519

† Current address: International Institute of Tropical Agriculture, Nairobi P.O. Box 30772-00100, Kenya.

## Supplementary Materials

**Table S1.** Comparison of DOC determination between the non-purgeable organic carbon (NPOC) and the total organic carbon (TOC) by difference<sup>1</sup> techniques.

| Analysis Technique for DOC Determination        | Average DOC (mg C l <sup>-1</sup> ) |
|-------------------------------------------------|-------------------------------------|
| NPOC                                            | 0.8125±0.0161                       |
| TOC by difference (TOC = total C – inorganic C) | 0.8289±0.0756                       |

<sup>1</sup>The TOC by difference technique separately determines total C (TC) and inorganic C (IC) which are subsequently subtracted from each other (TOC = TC – IC).

### Reference:

Wallace, B.; Purcell, M.; Furlong, J. Total organic carbon analysis as a precursor to disinfection byproducts in potable water: Oxidation technique considerations. *J. Environ. Monit.* **2002**, 4(1), 35–42. <https://doi.org/10.1039/b106049j>.
